# Supplementary material for: Factors Associated with the Implementation of Pediatric Immunization Services: A Survey of Community Pharmacies
Source: MDPI journal article supplement (doi:10.3390/vaccines12010093), 2024-01-18
Supplement: s1 [file s1]

**Table S2:** Pharmacists' Perceived Barriers and Roles in Pediatric Immunization Services Measures

| Measure <sup>†</sup>                                                | Number<br>of items | $\mu$ (SD)  | Cronbach's $\alpha$ |
|---------------------------------------------------------------------|--------------------|-------------|---------------------|
| Pharmacists' Perceived Pediatric Immunization Barriers <sup>a</sup> | 14                 | 2.21 (0.57) | .855                |
| <i>Pediatric Vaccination Knowledge</i>                              | 3                  | 2.13 (0.81) | .892                |
| <i>Pediatric Vaccination Proficiency and Attitude</i>               | 3                  | 2.25 (0.82) | .808                |
| <i>Implementation Logistics</i>                                     | 6                  | 1.96 (0.68) | .780                |
| <i>Child Vaccine Apprehension</i>                                   | 2                  | 2.99 (0.94) | .948                |
| Pharmacists' Perceived Pediatric Vaccination Role <sup>b</sup>      | 3                  | 2.29 (0.77) | .747                |

<sup>†</sup>Exploratory factor analyses (EFA) of the pharmacists' perceived barrier measure identified 4 components: pediatric vaccination knowledge, pediatric vaccination proficiency and attitude, implementation logistics, and child vaccine apprehension while the EFA of the perceived role measure resulted in only one component.

<sup>a</sup> Responses range from not a barrier (1) to a major barrier (4)

<sup>b</sup> Responses range from strongly agree (1) to strongly disagree (4)
