# Supplementary material for: Factors Associated with the Implementation of Pediatric Immunization Services: A Survey of Community Pharmacies
Source: MDPI journal article supplement (doi:10.3390/vaccines12010093), 2024-01-18
Supplement: s1 [file s1]

**Table S1:** Pharmacists' Perceived Pediatric Immunization Barriers (PI-B) Exploratory Factor Analysis (EFA) at Factor Loading Level of 0.40 or greater<sup>†</sup>

| Item <sup>†</sup>                                                  | Components |      |      |      |
|--------------------------------------------------------------------|------------|------|------|------|
|                                                                    | 1          | 2    | 3    | 4    |
| <b>Pediatric Immunization Knowledge</b>                            |            |      |      |      |
| <i>Pharmacists' knowledge of pediatric vaccines</i>                | .853       |      |      |      |
| <i>Pharmacists' familiarity of pediatric vaccination schedules</i> | .850       |      |      |      |
| <i>Screening for pediatric vaccine appropriateness</i>             | .701       |      |      |      |
| <b>Pediatric Immunization Proficiency and Attitude</b>             |            |      |      |      |
| <i>Pharmacists' experience with pediatric vaccination</i>          |            | .854 |      |      |
| <i>Pharmacists' pediatric vaccination technique</i>                |            | .601 |      |      |
| <i>Pharmacists' resistance to vaccinate children</i>               |            | .598 |      |      |
| <b>Implementation Logistics</b>                                    |            |      |      |      |
| <i>Physician (e.g., pediatrician) buy-in</i>                       |            |      | .726 |      |
| <i>Legal liability</i>                                             |            |      | .631 |      |
| <i>Vaccine prescription requirements</i>                           |            |      | .625 |      |
| <i>Parental buy-in</i>                                             |            |      | .584 |      |
| <i>Availability of space for vaccine administration</i>            |            |      | .483 |      |
| <i>Documentation requirements</i>                                  |            |      | .418 |      |
| <b>Child Vaccine Apprehension</b>                                  |            |      |      |      |
| <i>Children's fear of needles</i>                                  |            |      |      | .972 |
| <i>Children afraid/uncooperative/opposed</i>                       |            |      |      | .867 |

<sup>†</sup>Items (8) "reimbursement/insurance issues," (9) "time constraints of pharmacy personnel," and (17) "caregiver afraid/uncooperative/opposed" were dropped due to failing to load at factor loading level < .40. Bartlett's Test of Sphericity:  $\chi^2(n = 92) = 1678.61$  ( $p < 0.001$ ); Kaiser-Meyer-Olkin MSA = 0.803.
